# Supplementary material for: Guest-Host Interactions in Symmetrical Carboxy Heptamethine Cyanine Dyes-Titanium Dioxide Systems: Synthesis, Theoretical Calculations, Aggregation Properties, and Application in Dye-Sensitized Solar Cells
Source: Hindawi journal article supplement (doi:10.1155/2021/8852979), 2021-01-25
Supplement: f1 [file 8852979.f1.docx]

**Guest‐host interactions in symmetrical carboxy heptamethine cyanine dyes-titanium dioxide systems: Synthesis, theoretical calculations, aggregation properties, and application in dye sensitized solar cells**

Rodrigo da Costa Duarte,1 Matheus Costa de Oliveira,2 Josene Maria Toldo,3,4 Paulo Fernando Bruno Gonçalves,3 Marcos José Leite Santos,2,* Fabiano Severo Rodembusch1,*

1Grupo de Pesquisa em Fotoquímica Orgânica Aplicada (GPFOA). Instituto de Química, Universidade Federal do Rio Grande do Sul. Av. Bento Gonçalves 9500. CEP 91501-970 Porto Alegre-RS, Brazil. E-mail: fabiano.rodembusch@ufrgs.br

2Laboratório de Materiais Aplicados e Interfaces (LAMAI). Instituto de Química, Universidade Federal do Rio Grande do Sul.Av. Bento Gonçalves 9500. CEP 91501-970 Porto Alegre-RS, Brazil. E-mail: mjls@ufrgs.br

3Grupo de Química Teórica e Computacional, Universidade Federal do Rio Grande do Sul - Instituto de Química, Avenida Bento Gonçalves, 9500, CP 15003, CEP 91501-970 Porto Alegre-RS, Brazil.

4Aix Marseille University, CNRS, ICR, Marseille, France.

**Summary**

| Spectroscopic characterization.................................................................................. | 2 |
| --- | --- |
| Additional data for DSSCs preparation..................................................................... | 25 |
| Theoretical Calculations............................................................................................ | 27 |
| Additional photophysical data.................................................................................. | 33 |
| SEM images.............................................................................................................. | 37 |

**Spectroscopic characterization**

**Figure S1.** 1H NMR spectrum of compound **3** in CDCl3 (300 MHz).

**Figure S2.** 13C NMR spectrum of compound **3** in CDCl3 (75 MHz).

**Figure S3.** 1H NMR spectrum of compound **5** in DMSO-*d6* (300 MHz).

**Figure S4.** 13C NMR spectrum of compound **5** in DMSO-*d6* (75 MHz).

**Figure S5.** FTIR spectrum of compound **5** in NaCl window.

**Figure S6.** 1H NMR spectrum of compound **11a** in DMSO-*d6* (400 MHz).

**Figure S7.** 13C NMR spectrum of compound **11a** in DMSO-*d6* (100 MHz).

**Figure S8.** FTIR spectrum of compound **11a** in NaCl window.

**Figure S9.** 1H NMR spectrum of compound **11b** in DMSO-*d6* (300 MHz).

**Figure S10.** 13C NMR spectrum of compound **11b** in DMSO-*d6* (75 MHz).

**Figure S11.** FTIR spectrum of compound **11b** in NaCl window.

**Figure S12.** 1H NMR spectrum of compound **11c** in DMSO-*d6* (400 MHz).

**Figure S13.** 13C NMR spectrum of compound **11c** in DMSO-*d6* (100 MHz).

**Figure S14.** FTIR spectrum of compound **11c** in NaCl window.

**Figure S15.** 1H NMR spectrum of compound **12** in DMSO-*d6* (300 MHz).

**Figure S16.** 13C NMR spectrum of compound **12** in DMSO-*d6* (75 MHz).

**Figure S17.** FTIR spectrum of compound **12** in NaCl window.

**Figure S18.** 1H NMR spectrum of compound **13** in DMSO-*d6* (300 MHz).

**Figure S19.** 13C NMR spectrum of compound **13** in DMSO-*d6* (75 MHz).

**Figure S20.** FTIR spectrum of compound **13** in NaCl window.

**Figure S21.** 1H NMR spectrum of compound **14** in DMSO-*d6* (300 MHz).

**Figure S22.** 13C NMR spectrum of compound **14** in DMSO-*d6* (75 MHz).

**Figure S23.** FTIR spectrum of compound **14** in NaCl window.

**Additional data for DSSCs preparation**

*Electrode (anode)*

The glass plates with the conductive surface of fluorine-doped tin oxide (FTO) were previously cut to 1.5 cm x 1.6 cm and were subjected to a rigorous cleaning process, where the substrates were immersed in a solution of water and detergent for 1 h in a 135 WRMS USC-1600A ultrasound bath of the UNIQUE brand at 60ºC, followed by washes with distilled water, ethanol, and acetone, after which the conductive substrate was dried under argon flow, followed by exposure to a 200 W ultraviolet lamp for 30 minutes. After the cleaning step, the substrate was immersed in an aqueous solution of 40 mM TiCl4, at 80ºC for 40 minutes to form a thin adhesive layer of TiO2, which was later washed with anhydrous ethanol and dried under argon flow. This layer was then sintered at 400ºC in a tubular oven for 30 minutes. The 20 nm TiO2 nanoparticle paste was deposited by silkscreen onto the conductive substrate. After deposition, it was waited 10 minutes to level the obtained film and then the substrate was heated on a heating plate at a temperature of 125ºC for 10 minutes in order to evaporate the solvents contained in the nano colloidal TiO2 solution. After this period, the deposition of the second layer of TiO2 was repeated and heated. The substrate was taken to the oven and heated slowly to 450ºC, to remove organic compounds, sinter the film, and to promote the change of TiO2 from the amorphous phase to the crystalline anatase phase. After sintering the TiO2 film, a new immersion of the conductive substrate containing the TiO2 film was performed in the 40 mM TiCl4 solution at 80º for 40 minutes. Then, the electrode was washed again with anhydrous ethanol, to remove excess TiCl4, and taken to the oven at 450ºC for 30 minutes. The sintered film was then immersed in the sensitizer dye solution for 12 hours to allow the adsorption of the dye on the electrode surface.

*Counter electrode (cathode)*

Glass slides covered with FTO were cut to 1.5 cm x 1.6 cm. Holes were drilled at a distance of approximately 0.6 mm from the edge, followed by cleaning in a solution of water and detergent for 1 h in an ultrasound bath of 135 WRMS USC-1600A of the UNIQUE brand at 60ºC, followed by washing with water distilled water, ethanol and acetone. Then, the conductive substrate was dried under argon flow and subsequently exposed to a 200 W ultraviolet lamp for 30 minutes. After cleaning the electrode, 30μL of chloroplatinic acid was deposited on the surface of the FTO and taken to the oven at 500ºC for another 30 minutes, to obtain an active platinum film. The two parts (anode and cathode) of the device were joined in the form of a sandwich using a 25 μm thick polymeric spacer (Meltonix) between them. The polymeric adhesive was carried out at 100 ºC on a heating plate. After the union of the anode and cathode, 30 μL of the redox pair solution 3I-/I3- was injected into the cell through the hole, previously prepared in the counter electrode, the device was sealed using the polymeric spacer and glass at 100ºC.

**Theoretical Calculations**

Table S1. Absorption (abs) and emission (em) maxima wavelength and respective oscillator strengths (*f*), calculated Stokes shift (ST), and dipole moments (*μ)* calculated at M06-2X/6-311+G(d,p)//M06-2X/6-31G(d,p) in PCM/methanol and PCM/DMF for heptamethine cyanines 12-14.

| **Dye** | **Solvent** | **abs (nm)** | ***fabs*** | **em**  **(nm)** | ***fem*** | **ST**  **(cm-1)** | ***μ* (S0)**  **(D)** | ***μ* (S1)**  **(D)** |
| --- | --- | --- | --- | --- | --- | --- | --- | --- |
| **12** | DMF | 7.32 | 2.611 | 757 | 2.630 | 25 | 12.9 | 14.6 |
| CH3OH | 731 | 2.610 | 755 | 2.629 | 25 | 12.9 | 14.5 |
| **13** | DMF | 731 | 2.610 | 756 | 2.628 | 25 | 12.3 | - |
| CH3OH | 730 | 2.608 | 755 | 2.626 | 25 | 12.2 | 13.9 |
| **14** | DMF | 731 | 2.600 | 757 | 2.721 | 25 | 11.1 | - |
| CH3OH | 730 | 2.598 | 756 | 2.619 | 26 | 11.1 | 12.8 |


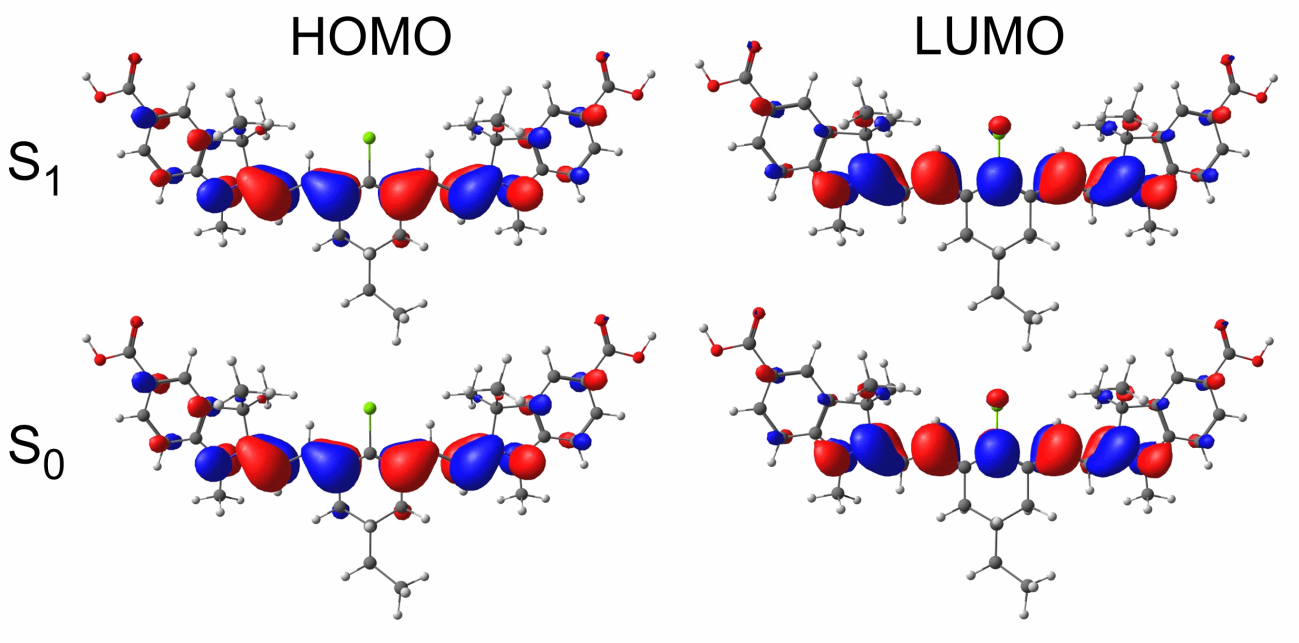


Figure S24. Natural transition orbitals for the vertical transitions S0→S1 and S1→S0 involving the ground and first excited states of cyanine 13 in PCM/methanol.


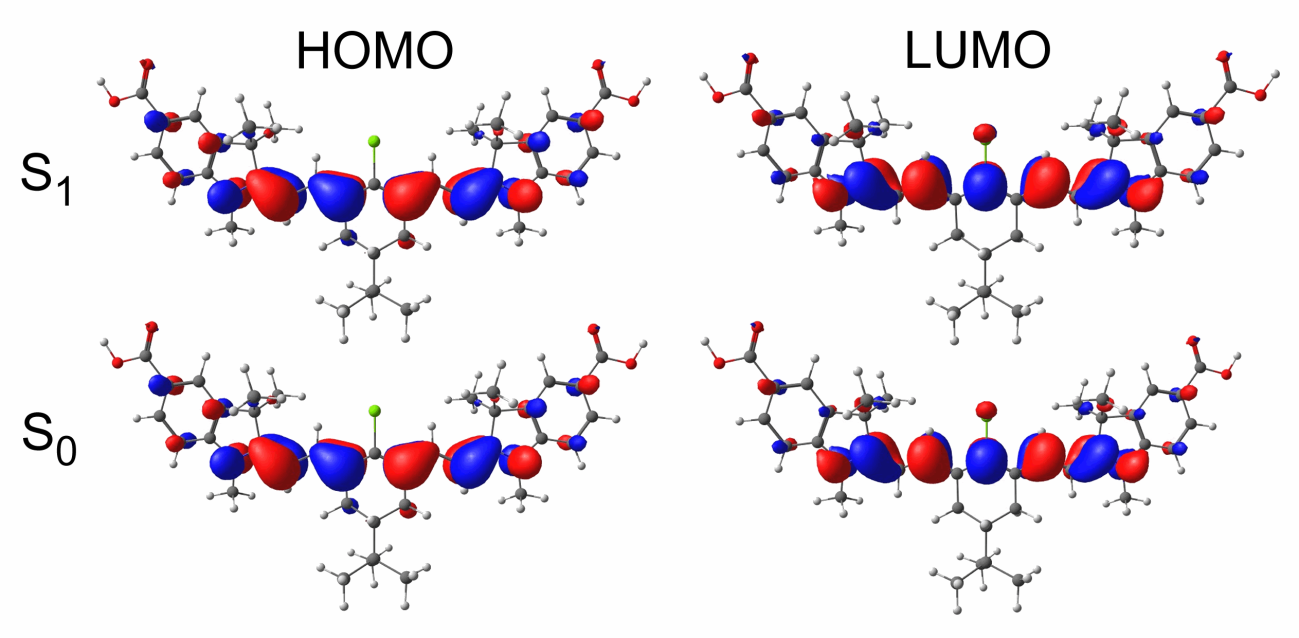


Figure S25. Natural transition orbitals for the vertical transitions S0→S1 and S1→S0 involving the ground and first excited states of cyanine 14 in PCM/methanol.


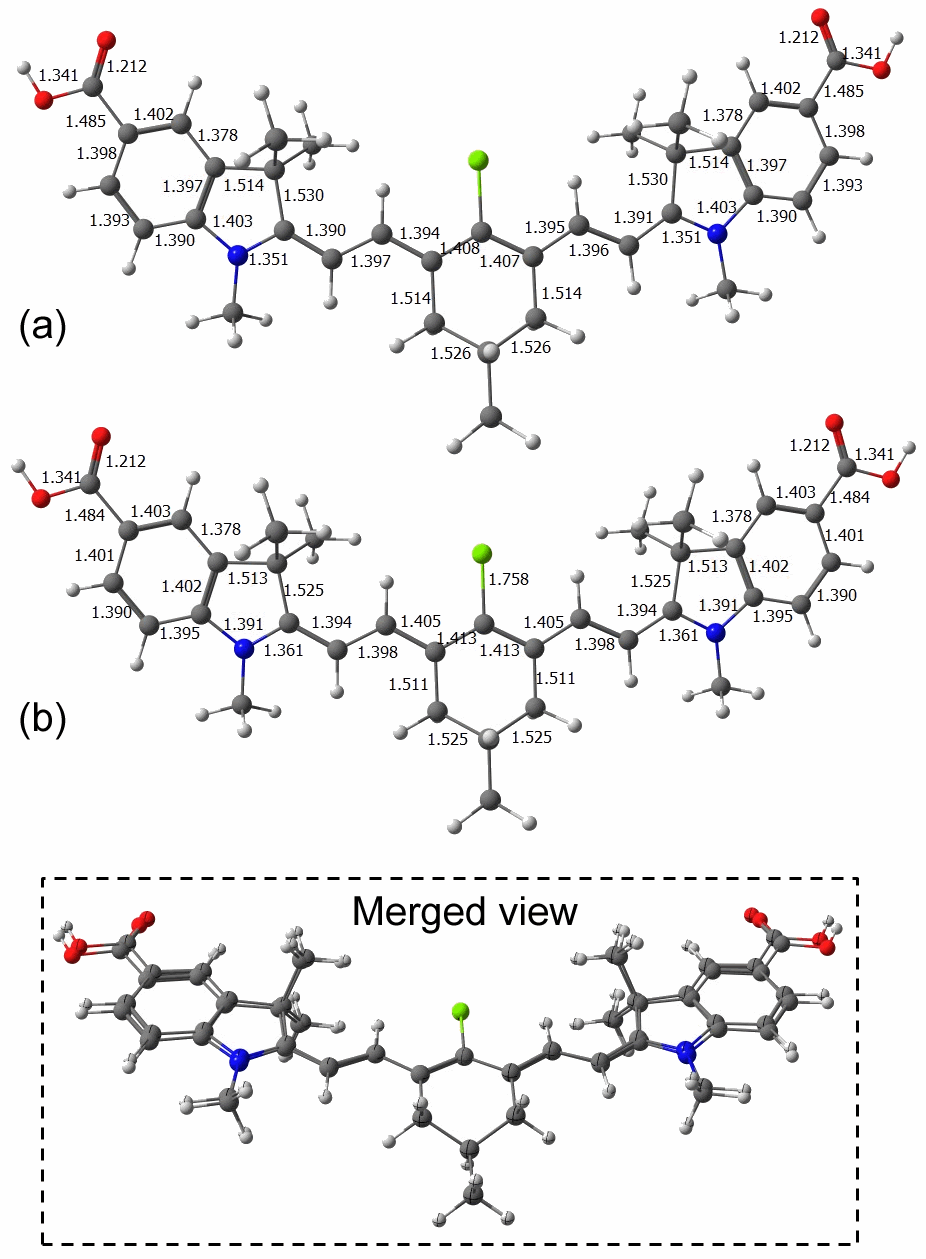


Figure S26. Optimized geometries for the (a) ground and (b) first excited states of cyanine 12 in PCM/methanol. A merged view (S0 and S1) was presented for comparison.


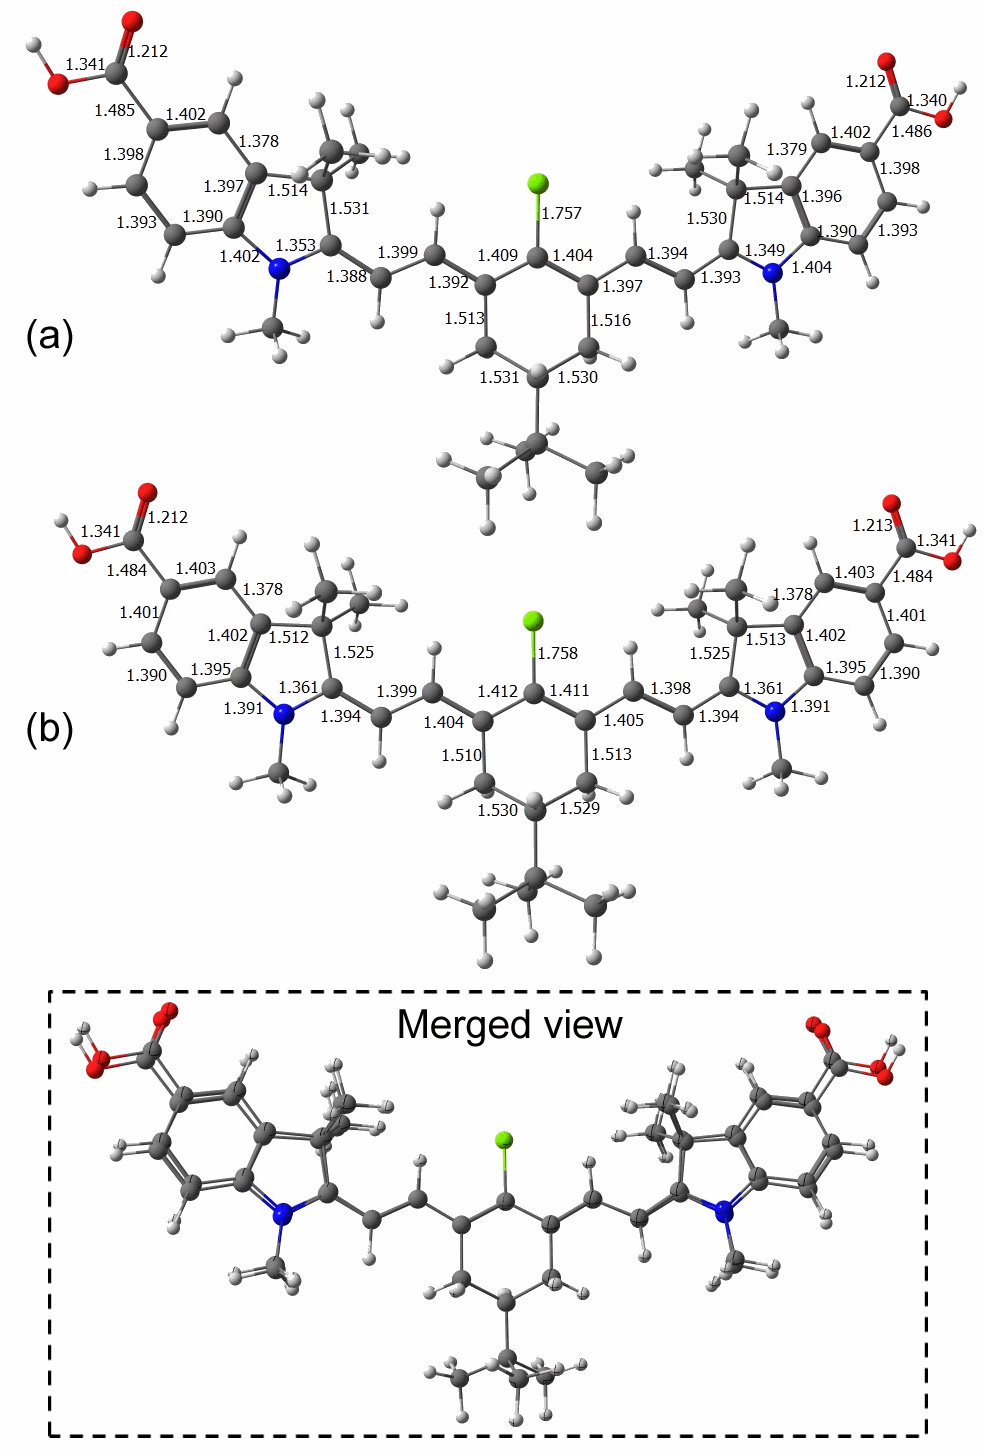


Figure S27. Optimized geometries for the (a) ground and (b) first excited states of cyanine 14 in PCM/methanol. A merged view (S0 and S1) was presented for comparison.

Table S2. HOMO and LUMO energies (in eV) and energy gaps determined by the three different approaches: taken directly from DFT calculation (KS gap), computed as EA and IP (ΔSCF), and estimated using the optical gap (Δopt). LHE values and contribution to the main excitation (HOMO-LUMO) calculated at TD-DFT level are also shown. All calculations were done at M06-2X/6-311+G(d,p)//M06-2X/6-31G(d,p) in PCM/methanol level.

| **Dye** | **Method** | **HOMO** | **LUMO** | **H-L gap** | **Contribution to**  **HOMO-LUMO** | **LHE** |
| --- | --- | --- | --- | --- | --- | --- |
| **12** | KS gap | -6.46 | -2.95 | 3.50 |  |  |
| ΔSCF | -5.56 | -3.85 | 1.70 |  |  |
| Δopt | -6.46 | -4.76 | 1.70 | 70% | 0.9975 |
| **13** | KS gap | -6.46 | -2.95 | 3.51 |  |  |
| ΔSCF | -5.56 | -3.85 | 1.70 |  |  |
| Δopt | -6.46 | -4.76 | 1.70 | 70% | 0.9975 |
| **14** | KS gap | -6.46 | -2.95 | 3.51 |  |  |
| ΔSCF | -5.55 | -5.55 | 1.63 |  |  |
| Δopt | -6.46 | -4.76 | 1.70 | 70% | 0.9975 |

Table S3. Structural parameters calculated for heptamethine cyanines dyes 12-14 in the ground and excited state computed at M06-2X/6-311+G(d,p)//M06-2X/6-31G(d,p) in PCM/methanol level. Bond lengths (r) are presented in Å and dihedral angles in degrees.

**
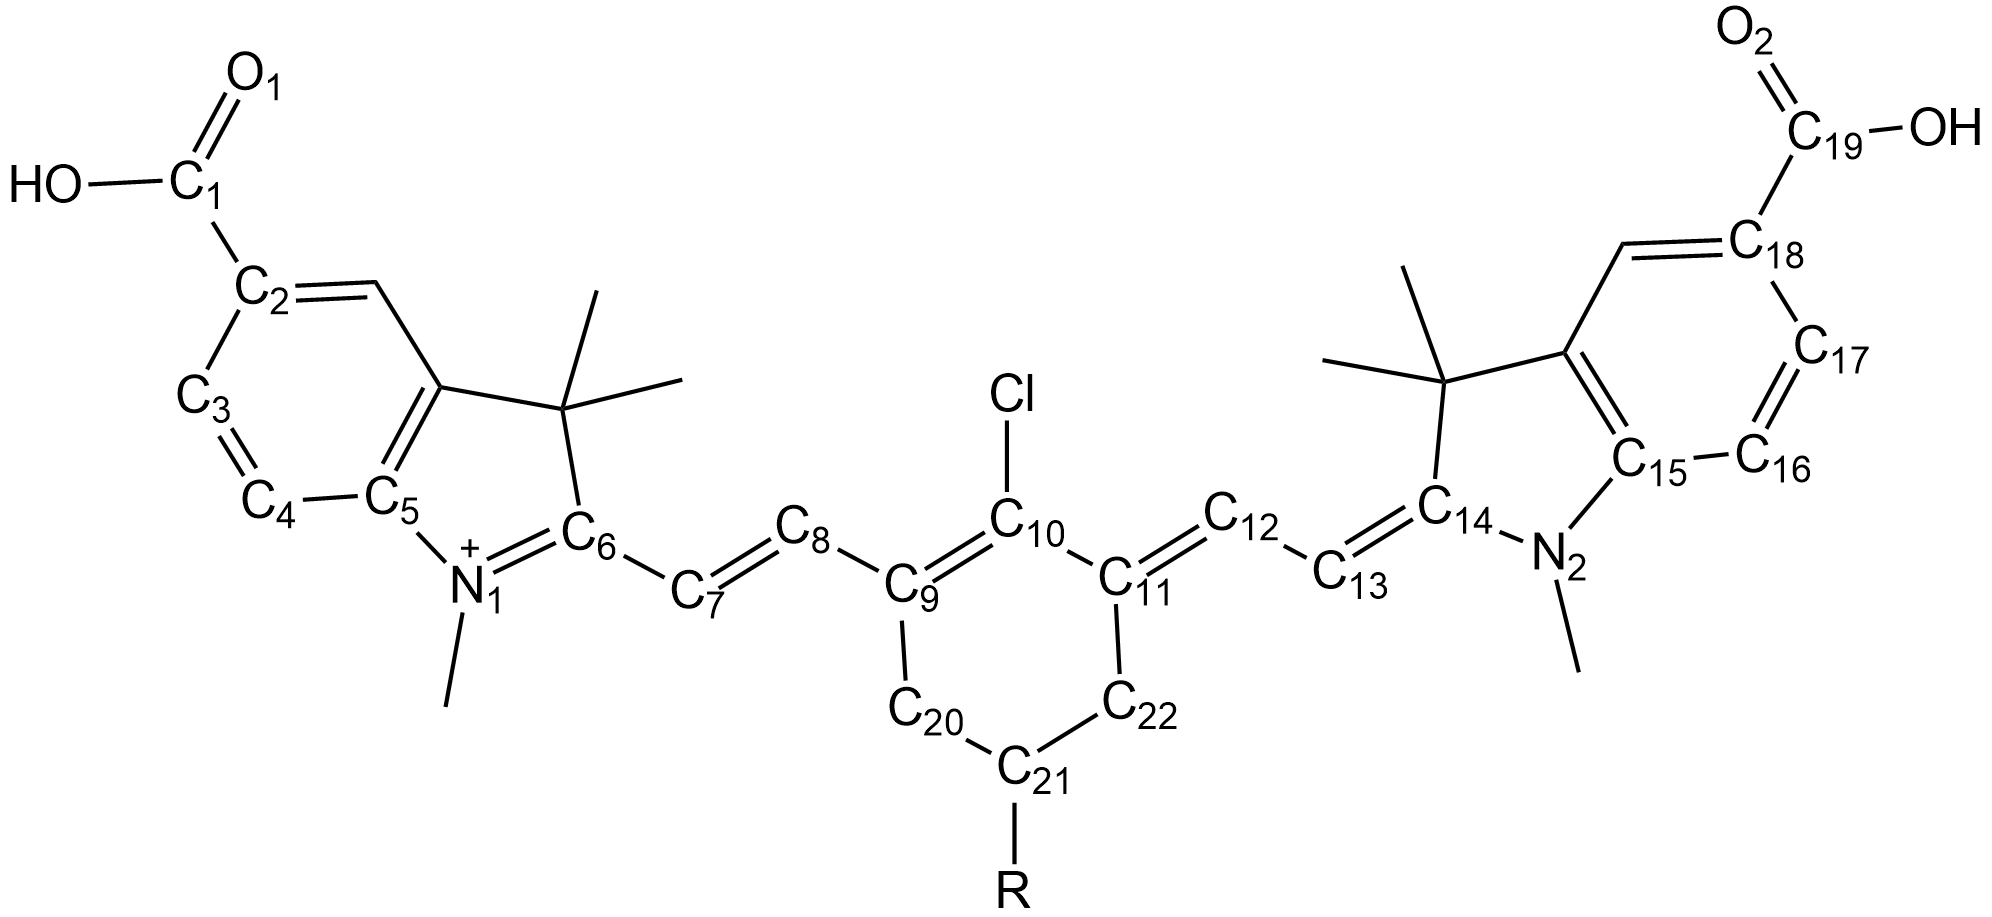
**

| **Parameter** | **Dye 12** | | **Dye 13** | | **Dye 14** | |
| --- | --- | --- | --- | --- | --- | --- |
| **S0** | **S1** | **S0** | **S1** | **S0** | **S1** |
| ∠O1C1C2C3 | 179.895 | 179.956 | 179.888 | 179.977 | 179.984 | 179.917 |
| ∠N1C6C7C8 | 179.625 | 179.595 | 179.513 | 179.679 | 179.586 | 179.542 |
| ∠C7C8C9C10 | 175.311 | 175.776 | 175.406 | 175.904 | 176.534 | 176.535 |
| ∠C9C10C11C12 | 174.429 | 174.751 | 174.985 | 175.333 | 177.712 | 176.710 |
| ∠C12C13C14N2 | 179.592 | 179.599 | 179.759 | 179.887 | 179.744 | 179.946 |
| ∠C17C18C19O2 | 179.871 | 179.964 | 179.933 | 179.998 | 179.966 | 179.952 |
| ∠C10C9C20C21 | 25.572 | 26.375 | 23.510 | 23.737 | 19.442 | 21.413 |
| r(C5-N1) | 1.403 | 1.391 | 1.404 | 1.391 | 1.404 | 1.391 |
| r(N1-C6) | 1.351 | 1.361 | 1. | 1.361 | 1.349 | 1.361 |
| r(C6-C7) | 1.391 | 1.394 | 1.391 | 1.394 | 1.393 | 1.394 |
| r(C7-C8) | 1.396 | 1.398 | 1.396 | 1.398 | 1.394 | 1.398 |
| r(C8-C9) | 1.395 | 1.405 | 1.395 | 1.405 | 1.397 | 1.405 |
| r(C9-C10) | 1.407 | 1.413 | 1.406 | 1.412 | 1.404 | 1.411 |
| r(C10-C11) | 1.408 | 1.413 | 1.408 | 1.412 | 1.409 | 1.412 |
| r(C11-C12) | 1.394 | 1.405 | 1.394 | 1.404 | 1.392 | 1.404 |
| r(C12-C13) | 1.397 | 1.398 | 1.397 | 1.398 | 1.399 | 1.399 |
| r(C13-C14) | 1.390 | 1.394 | 1.390 | 1.394 | 1.388 | 1.394 |
| r(C14-N2) | 1.351 | 1.361 | 1.352 | 1.361 | 1.353 | 1.361 |
| r(N2-C15) | 1.403 | 1.391 | 1.403 | 1.391 | 1.402 | 1.391 |

**Additional photophysical data**

**Figure S28.** Fluorescence emission spectra in MeOH and DMF solution (10-6 M) of the carboxy heptamethine dye **12** at different excitation wavelengths.

**Figure S29.** Fluorescence emission spectra in MeOH and DMF solution (10-6 M) of the carboxy heptamethine dye **13** at different excitation wavelengths.

**Figure S30.** Fluorescence emission spectra in MeOH and DMF solution (10-6 M) of the carboxy heptamethine dye **14** at different excitation wavelengths.

**Figure S31.** Excitation spectra in MeOH and DMF solution (10-6 M) of the carboxy heptamethine dye **12**.

**Figure S32.** Excitation spectra in MeOH and DMF solution (10-6 M) of the carboxy heptamethine dye **13**.

**Figure S33.** Excitation spectra in MeOH and DMF solution (10-6 M) of the carboxy heptamethine dye **14**.

**
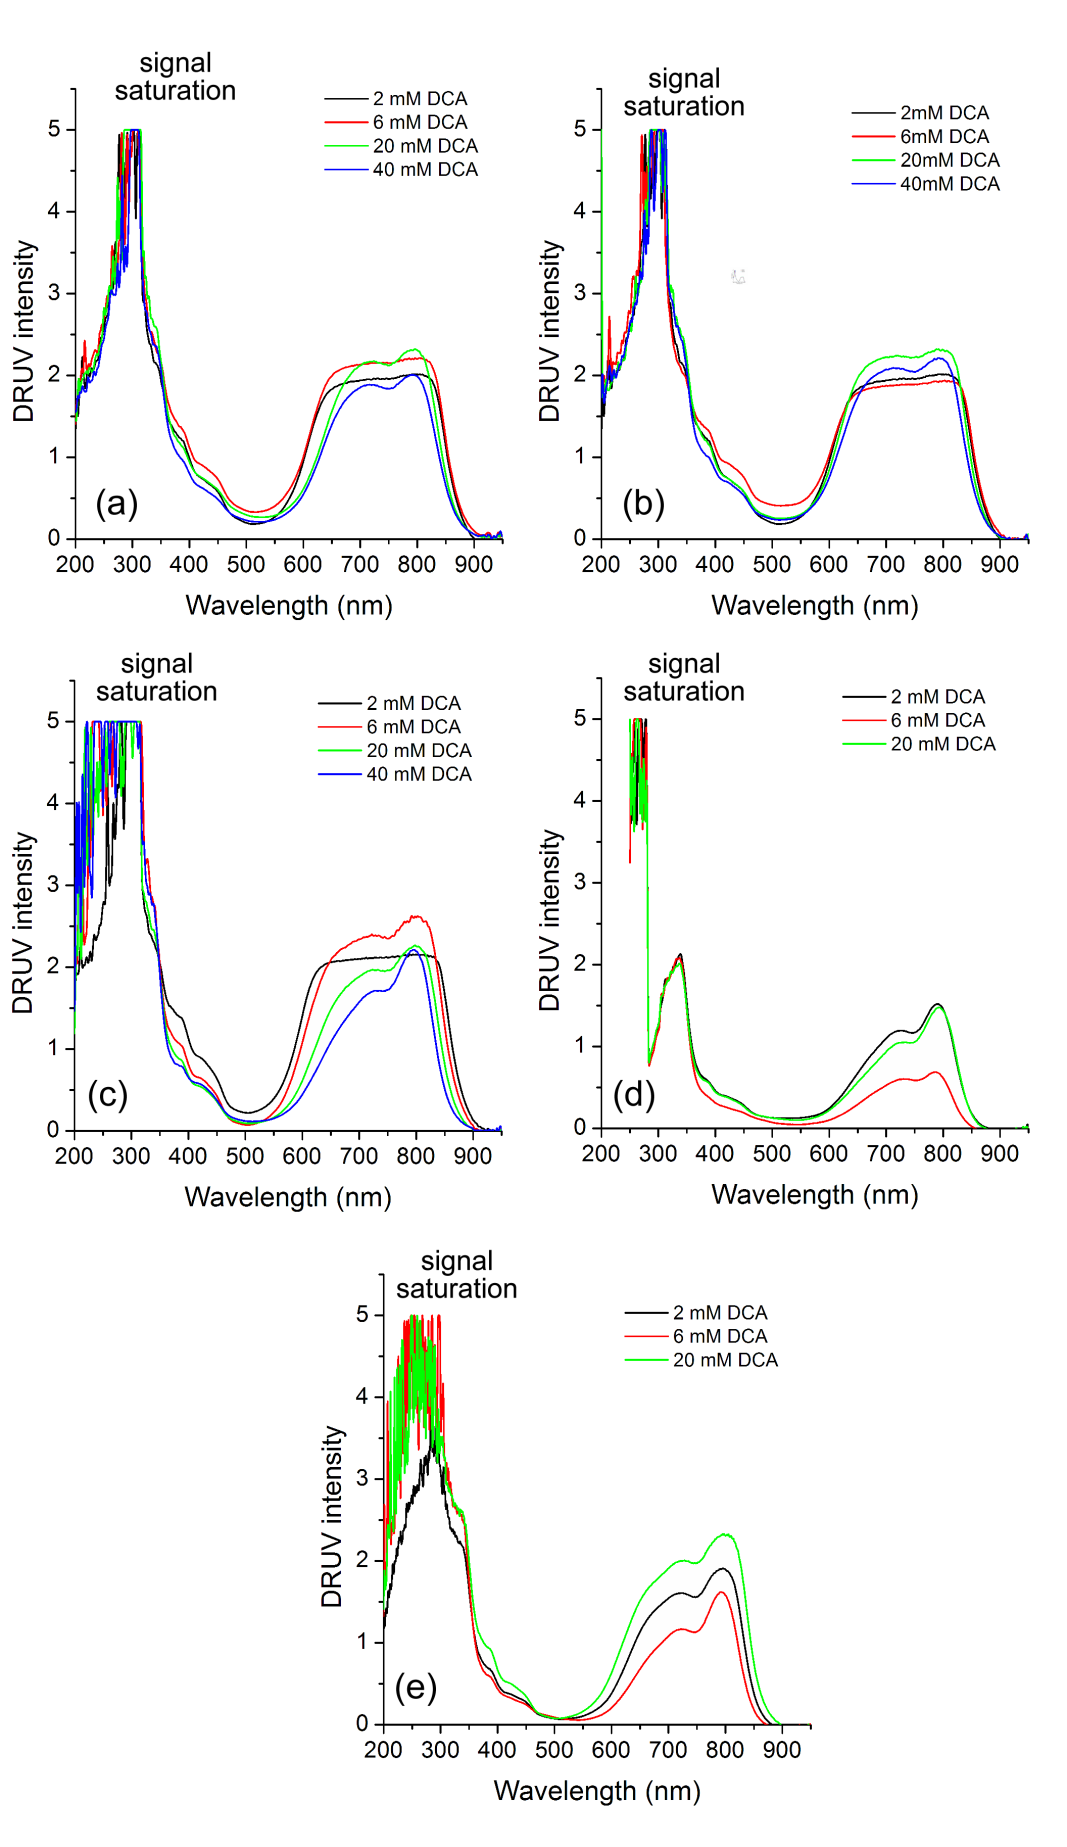
**

**Figure S34**. Original solid-state absorption spectra (DRUV) of cyanine **13** in TiO2 film obtained from different adsorption methodologies (a) #1, (b) #2, (c) #3, (d) #4, and (e) #5.

SEM images


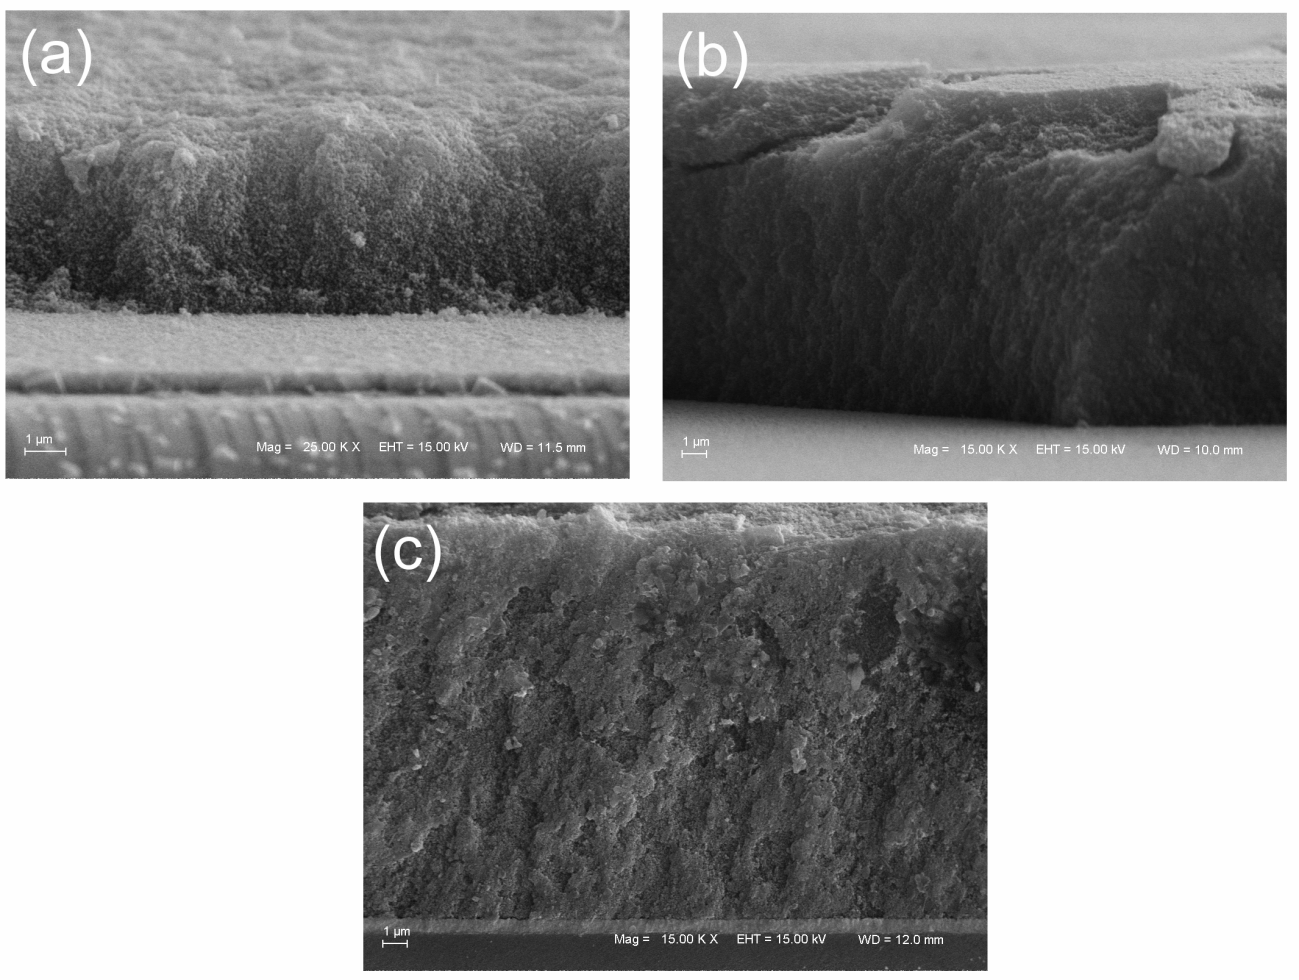


**Figure S34**. Scanning electron microscopy images of different TiO2 thicknesses, where (a) 1 layer (15 kV, magnification of 25000x), (b) 2 layers (15 kV, magnification of 15000x), and (c) 3 layers (15 kV, magnification of 15000x).
